# Supplementary material for: Noninvasive Brain Stimulation for Cancer Pain Management in Nonbrain Malignancy: A Meta-Analysis
Source: Hindawi journal article supplement (doi:10.1155/2023/5612061), 2023-03-03
Supplement: f1 [file 5612061.f1.docx]

**Supplementary materials**

**Noninvasive brain stimulation for cancer pain management in non-brain malignancy: a meta-analysis**

Yung-Jiun Chien, Chun-Yu Chang, Meng-Yu Wu, Yung-Chen Chien, Hsin-Chi Wu, Yi-Shiung Horng

**Supplementary Table S1.** Detailed search strategy

| **Database** | **Search strategy** |
| --- | --- |
| PubMed | #1:  "Neoplasms"[Mesh] OR "neoplasia" OR "neoplasias" OR "neoplasm" OR "tumor" OR "tumors" OR "tumour" OR "tumours" OR "cancer" OR "cancers" OR "malignancy" OR "malignancies" OR "malignant neoplasm" OR "malignant neoplasms" OR "oncology" OR "oncologies"  #2:  "Transcranial Magnetic Stimulation"[Mesh] OR "Transcranial Direct Current Stimulation"[Mesh]  #3:  "brain stimulation" OR "brain stimulations" OR "cranial stimulation" OR "cranial stimulations" OR "transcranial stimulation" OR "transcranial stimulations" OR "noninvasive brain stimulation" OR "noninvasive brain stimulations" OR "non-invasive brain stimulation" OR "non-invasive brain stimulations"  #4:  "Magnetic Stimulation, Transcranial" OR "Magnetic Stimulations, Transcranial" OR "Stimulation, Transcranial Magnetic" OR "Stimulations, Transcranial Magnetic" OR "Transcranial Magnetic Stimulations" OR "Transcranial Magnetic Stimulation, Single Pulse" OR "Transcranial Magnetic Stimulation, Paired Pulse" OR "Transcranial Magnetic Stimulation, Repetitive" OR "rTMS" OR "theta burst stimulation" OR "theta burst" OR "theta-burst"  #5:  "transcranial current stimulation" OR "transcranial current stimulations" OR "transcranial electric stimulation" OR "transcranial electric stimulations" OR "transcranial direct current stimulation" OR "transcranial direct current stimulations" OR "tDCS" OR "transcranial alternating current stimulation" OR "transcranial alternating current stimulations" OR "tACS" OR "Cathodal Stimulation Transcranial Direct Current Stimulation" OR "Cathodal Stimulation tDCS" OR "Cathodal Stimulation tDCSs" OR "Stimulation tDCS, Cathodal" OR "Stimulation tDCSs, Cathodal" OR "tDCS, Cathodal Stimulation" OR "tDCSs, Cathodal Stimulation" OR "Transcranial Random Noise Stimulation" OR "Electrical Stimulation, Transcranial" OR "Electrical Stimulations, Transcranial" OR "Stimulation, Transcranial Electrical" OR "Stimulations, Transcranial Electrical" OR "Anodal Stimulation Transcranial Direct Current Stimulation" OR "Anodal Stimulation tDCS" OR "Anodal Stimulation tDCSs" OR "Stimulation tDCS, Anodal" OR "Stimulation tDCSs, Anodal" OR "tDCS, Anodal Stimulation" OR "tDCSs, Anodal Stimulation" OR "Repetitive Transcranial Electrical Stimulation"  #6:  #2 OR #3 OR #4 OR #5  #7:  #1 AND #6 |
| Embase | #1:  'neoplasm'/exp OR 'neoplasm'  #2:  'neoplasia' OR 'neoplasias' OR 'neoplasm' OR 'tumor' OR 'tumors' OR 'tumour' OR 'tumours' OR 'cancer' OR 'cancers' OR 'malignancy' OR 'malignancies' OR 'malignant neoplasm' OR 'malignant neoplasms' OR 'oncology' OR 'oncologies'  #3:  'transcranial magnetic stimulation'/exp OR 'transcranial magnetic stimulation'  #4:  'transcranial direct current stimulation'/exp OR 'transcranial direct current stimulation'  #5:  'brain stimulation' OR 'brain stimulations' OR 'cranial stimulation' OR 'cranial stimulations' OR 'transcranial stimulation' OR 'transcranial stimulations' OR 'noninvasive brain stimulation' OR 'noninvasive brain stimulations' OR 'non-invasive brain stimulation' OR 'non-invasive brain stimulations'  #6:  'magnetic stimulation, transcranial' OR 'magnetic stimulations, transcranial' OR 'stimulation, transcranial magnetic' OR 'stimulations, transcranial magnetic' OR 'transcranial magnetic stimulations' OR 'transcranial magnetic stimulation, single pulse' OR 'transcranial magnetic stimulation, paired pulse' OR 'transcranial magnetic stimulation, repetitive' OR 'rtms' OR 'theta burst stimulation' OR 'theta burst' OR 'theta-burst'  #7:  'transcranial current stimulation' OR 'transcranial current stimulations' OR 'transcranial electric stimulation' OR 'transcranial electric stimulations' OR 'transcranial direct current stimulation' OR 'transcranial direct current stimulations' OR 'tdcs' OR 'transcranial alternating current stimulation' OR 'transcranial alternating current stimulations' OR 'tacs' OR 'cathodal stimulation transcranial direct current stimulation' OR 'cathodal stimulation tdcs' OR 'cathodal stimulation tdcss' OR 'stimulation tdcs, cathodal' OR 'stimulation tdcss, cathodal' OR 'tdcs, cathodal stimulation' OR 'tdcss, cathodal stimulation' OR 'transcranial random noise stimulation' OR 'electrical stimulation, transcranial' OR 'electrical stimulations, transcranial' OR 'stimulation, transcranial electrical' OR 'stimulations, transcranial electrical' OR 'anodal stimulation transcranial direct current stimulation' OR 'anodal stimulation tdcs' OR 'anodal stimulation tdcss' OR 'stimulation tdcs, anodal' OR 'stimulation tdcss, anodal' OR 'tdcs, anodal stimulation' OR 'tdcss, anodal stimulation' OR 'repetitive transcranial electrical stimulation'  #8:  #1 OR #2  #9:  #3 OR #4 OR #5 OR #6 OR #7  #10:  #8 AND #9 |
| Web of Science | #1:  TS =(“neoplasia” OR “neoplasias” OR “neoplasm” OR “tumor” OR “tumors” OR “tumour” OR “tumours” OR “cancer” OR “cancers” OR “malignancy” OR “malignancies” OR “malignant neoplasm” OR “malignant neoplasms” OR “oncology” OR “oncologies”)  #2:  TS= (“brain stimulation” OR “brain stimulations” OR “cranial stimulation” OR “cranial stimulations” OR “transcranial stimulation” OR “transcranial stimulations” OR “noninvasive brain stimulation” OR “noninvasive brain stimulations” OR “non-invasive brain stimulation” OR “non-invasive brain stimulations”)  #3:  TS =(“Magnetic Stimulation, Transcranial” OR “Magnetic Stimulations, Transcranial” OR “Stimulation, Transcranial Magnetic” OR “Stimulations, Transcranial Magnetic” OR “Transcranial Magnetic Stimulations” OR “Transcranial Magnetic Stimulation, Single Pulse” OR “Transcranial Magnetic Stimulation, Paired Pulse” OR “Transcranial Magnetic Stimulation, Repetitive” OR “rTMS” OR “theta burst stimulation” OR “theta burst” OR “theta-burst” )  #4:  TS = (“transcranial current stimulation” OR “transcranial current stimulations” OR “transcranial electric stimulation” OR “transcranial electric stimulations” OR “transcranial direct current stimulation” OR “transcranial direct current stimulations” OR “tDCS” OR “transcranial alternating current stimulation” OR “transcranial alternating current stimulations” OR “tACS” OR “Cathodal Stimulation Transcranial Direct Current Stimulation” OR “Cathodal Stimulation tDCS” OR “Cathodal Stimulation tDCSs” OR “Stimulation tDCS, Cathodal” OR “Stimulation tDCSs, Cathodal” OR “tDCS, Cathodal Stimulation” OR “tDCSs, Cathodal Stimulation” OR “Transcranial Random Noise Stimulation” OR “Electrical Stimulation, Transcranial” OR “Electrical Stimulations, Transcranial” OR “Stimulation, Transcranial Electrical” OR “Stimulations, Transcranial Electrical” OR “Anodal Stimulation Transcranial Direct Current Stimulation” OR “Anodal Stimulation tDCS” OR “Anodal Stimulation tDCSs” OR “Stimulation tDCS, Anodal” OR “Stimulation tDCSs, Anodal” OR “tDCS, Anodal Stimulation” OR “tDCSs, Anodal Stimulation” OR “Repetitive Transcranial Electrical Stimulation”)  #5:  #2 OR #3 OR #4  #6:  #5 AND #1 |
| Cochrane Library | #1:  MeSH descriptor: [Neoplasms] explode all trees  #2:  “neoplasia” OR “neoplasias” OR “neoplasm” OR “tumor” OR “tumors” OR “tumour” OR “tumours” OR “cancer” OR “cancers” OR “malignancy” OR “malignancies” OR “malignant neoplasm” OR “malignant neoplasms” OR "oncology" OR "oncologies"  #3:  #1 OR #2  #4:  MeSH descriptor: [Transcranial Magnetic Stimulation] explode all trees  #5:  MeSH descriptor: [Transcranial Direct Current Stimulation] explode all trees  #6:  “brain stimulation” OR "brain stimulations" OR “cranial stimulation” OR “cranial stimulations” OR “transcranial stimulation” OR “transcranial stimulations”  #7:  “noninvasive brain stimulation” OR “noninvasive brain stimulations”  #8:  “Magnetic Stimulation, Transcranial” OR “Magnetic Stimulations, Transcranial” OR “Stimulation, Transcranial Magnetic” OR “Stimulations, Transcranial Magnetic” OR “Transcranial Magnetic Stimulations” OR “Transcranial Magnetic Stimulation, Single Pulse” OR “Transcranial Magnetic Stimulation, Paired Pulse” OR “Transcranial Magnetic Stimulation, Repetitive” OR “rTMS” OR “theta burst stimulation” OR “theta burst” OR “theta-burst”  #9:  “transcranial current stimulation” OR “transcranial current stimulations” OR “transcranial electric stimulation” OR “transcranial electric stimulations” OR “transcranial direct current stimulation” OR “transcranial direct current stimulations” OR “tDCS” OR “transcranial alternating current stimulation” OR “transcranial alternating current stimulations” OR “tACS” OR “Cathodal Stimulation Transcranial Direct Current Stimulation” OR “Cathodal Stimulation tDCS” OR “Cathodal Stimulation tDCSs” OR “Stimulation tDCS, Cathodal” OR “Stimulation tDCSs, Cathodal” OR “tDCS, Cathodal Stimulation” OR “tDCSs, Cathodal Stimulation” OR “Transcranial Random Noise Stimulation” OR “Electrical Stimulation, Transcranial” OR “Electrical Stimulations, Transcranial” OR “Stimulation, Transcranial Electrical” OR “Stimulations, Transcranial Electrical” OR “Anodal Stimulation Transcranial Direct Current Stimulation” OR “Anodal Stimulation tDCS” OR “Anodal Stimulation tDCSs” OR “Stimulation tDCS, Anodal” OR “Stimulation tDCSs, Anodal” OR “tDCS, Anodal Stimulation” OR “tDCSs, Anodal Stimulation” OR “Repetitive Transcranial Electrical Stimulation”  #10:  #4 OR #5 OR #6 OR #7 OR #8 OR #9  #11:  #3 AND #10 |

**
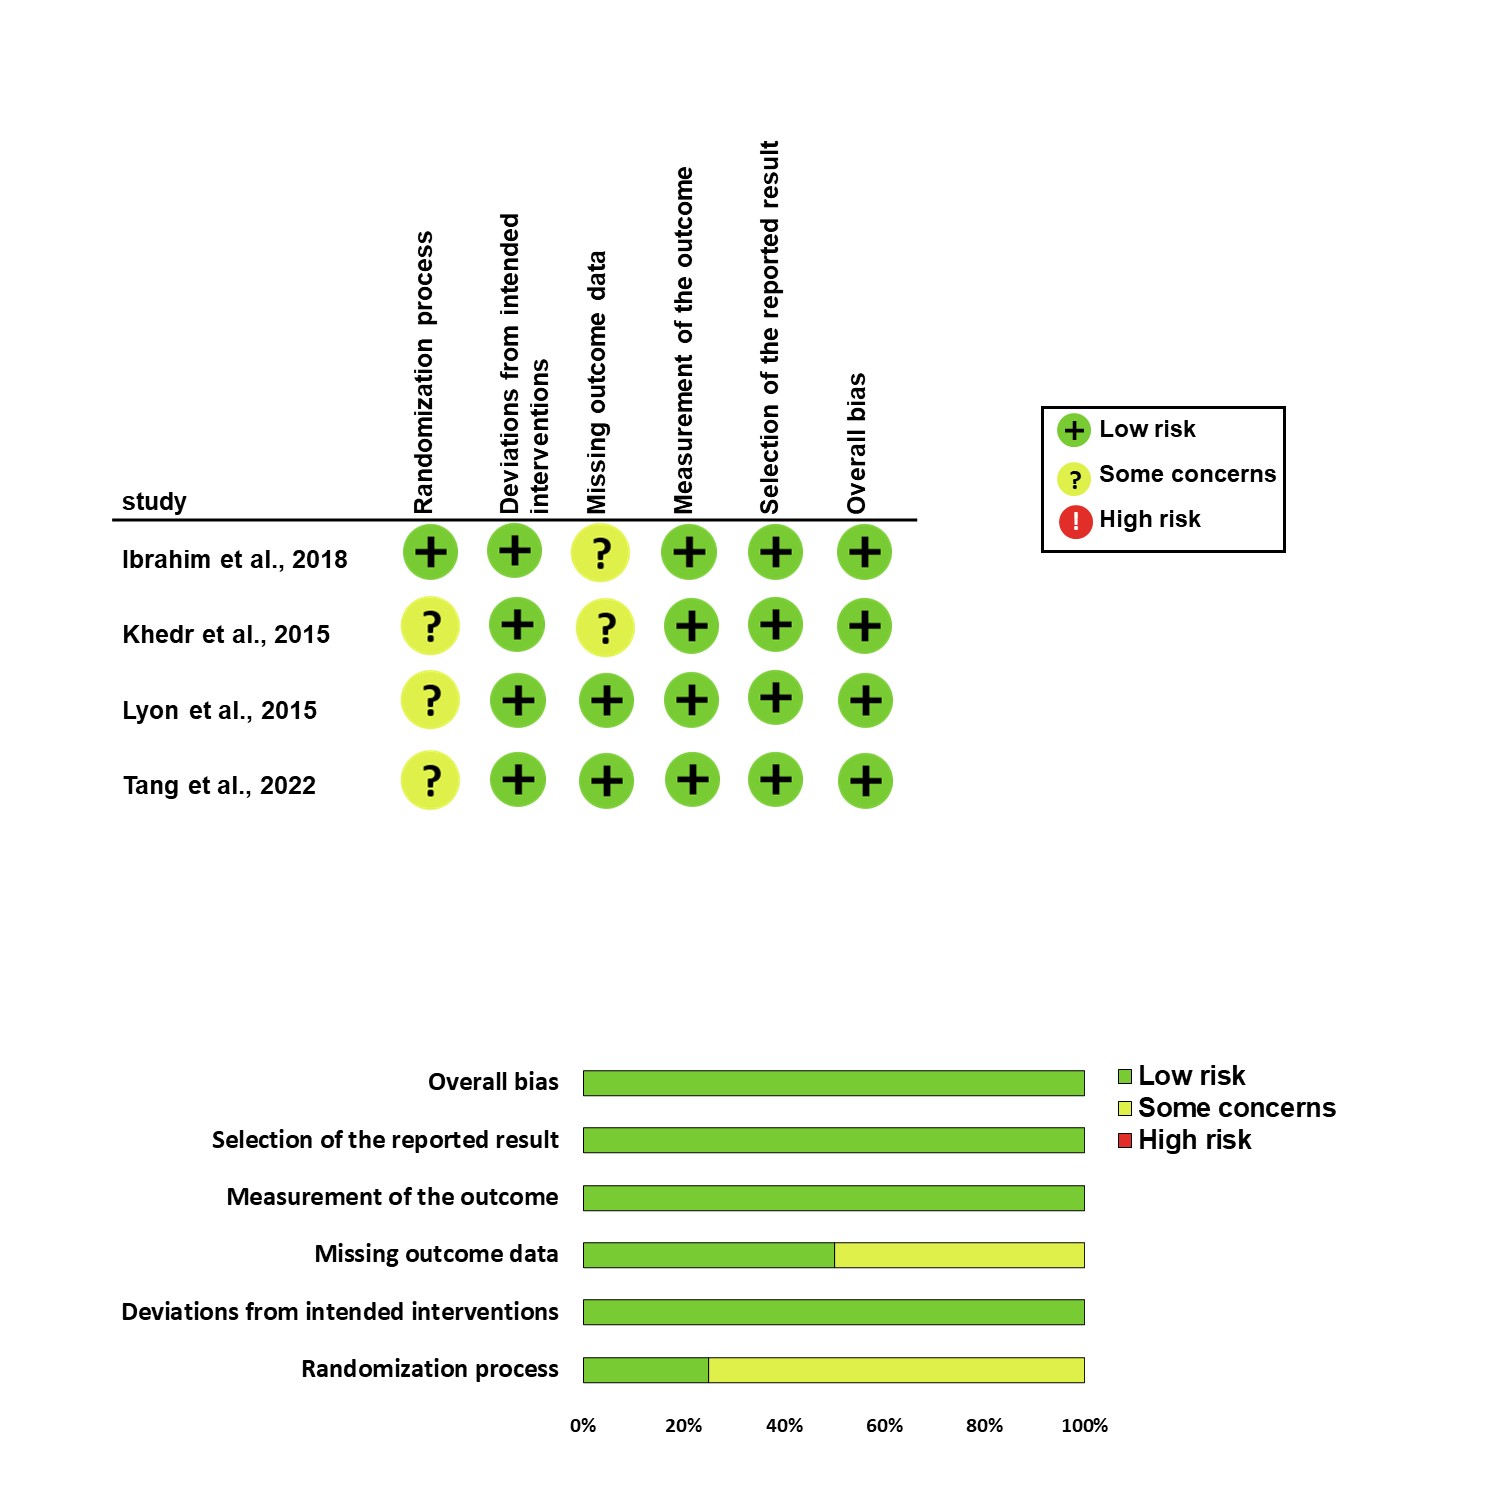
Supplementary Figure S2.** Risk of bias summary and graph


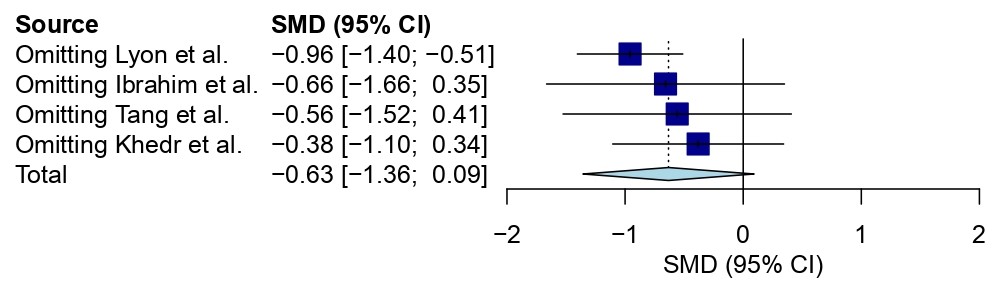
**Supplementary Figure S3. Influence analysis of pain intensity**


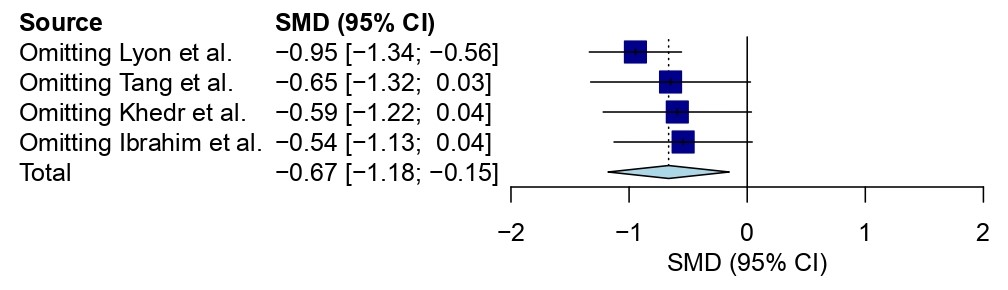


**Supplementary Figure S4. Influence analysis of depression**


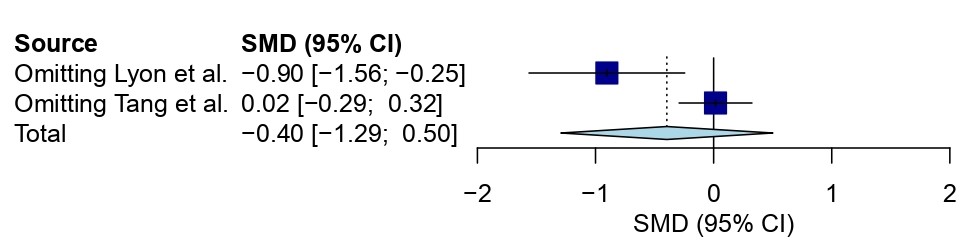


**Supplementary Figure S5. Influence analysis of anxiety**
